# Supplementary figures and images for: Large‐scale prion protein genotyping in Canadian caribou populations and potential impact on chronic wasting disease susceptibility
Source: PubMed Central journal article supplement — Mol Ecol. 2020 Sep 10;29(20):3830–40. doi: 10.1111/mec.15602 (PMC7590118; doi:10.1111/mec.15602), 2020-09-10

A)

153 Y→F

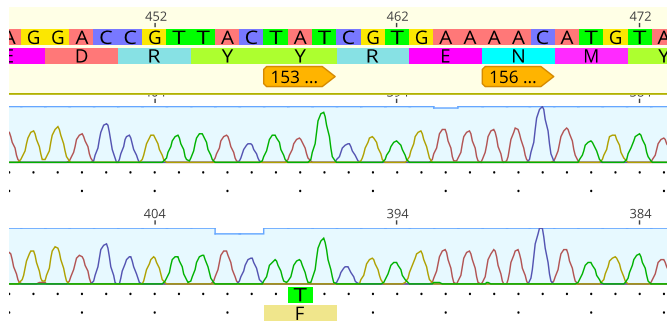

B)

242 P→L

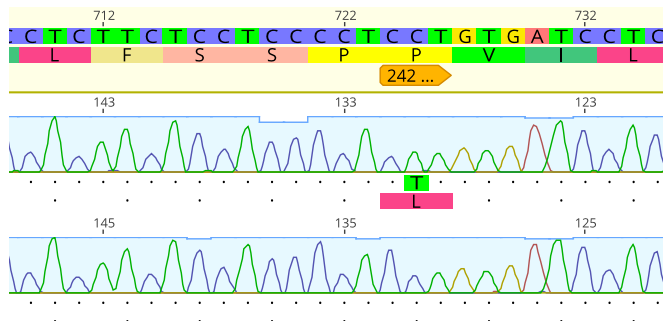

C)

176 N→D

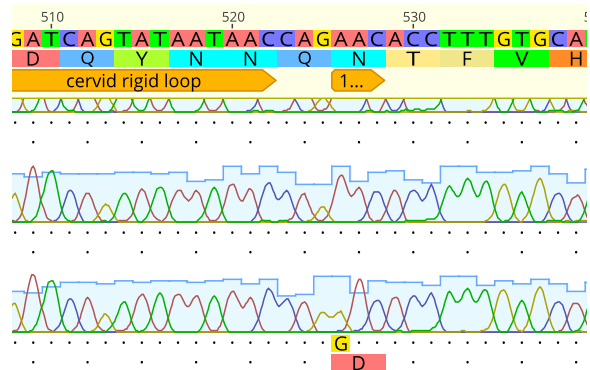

Supplement: MEC-29-3830-s001.pdf [file MEC-29-3830-s001.pdf]

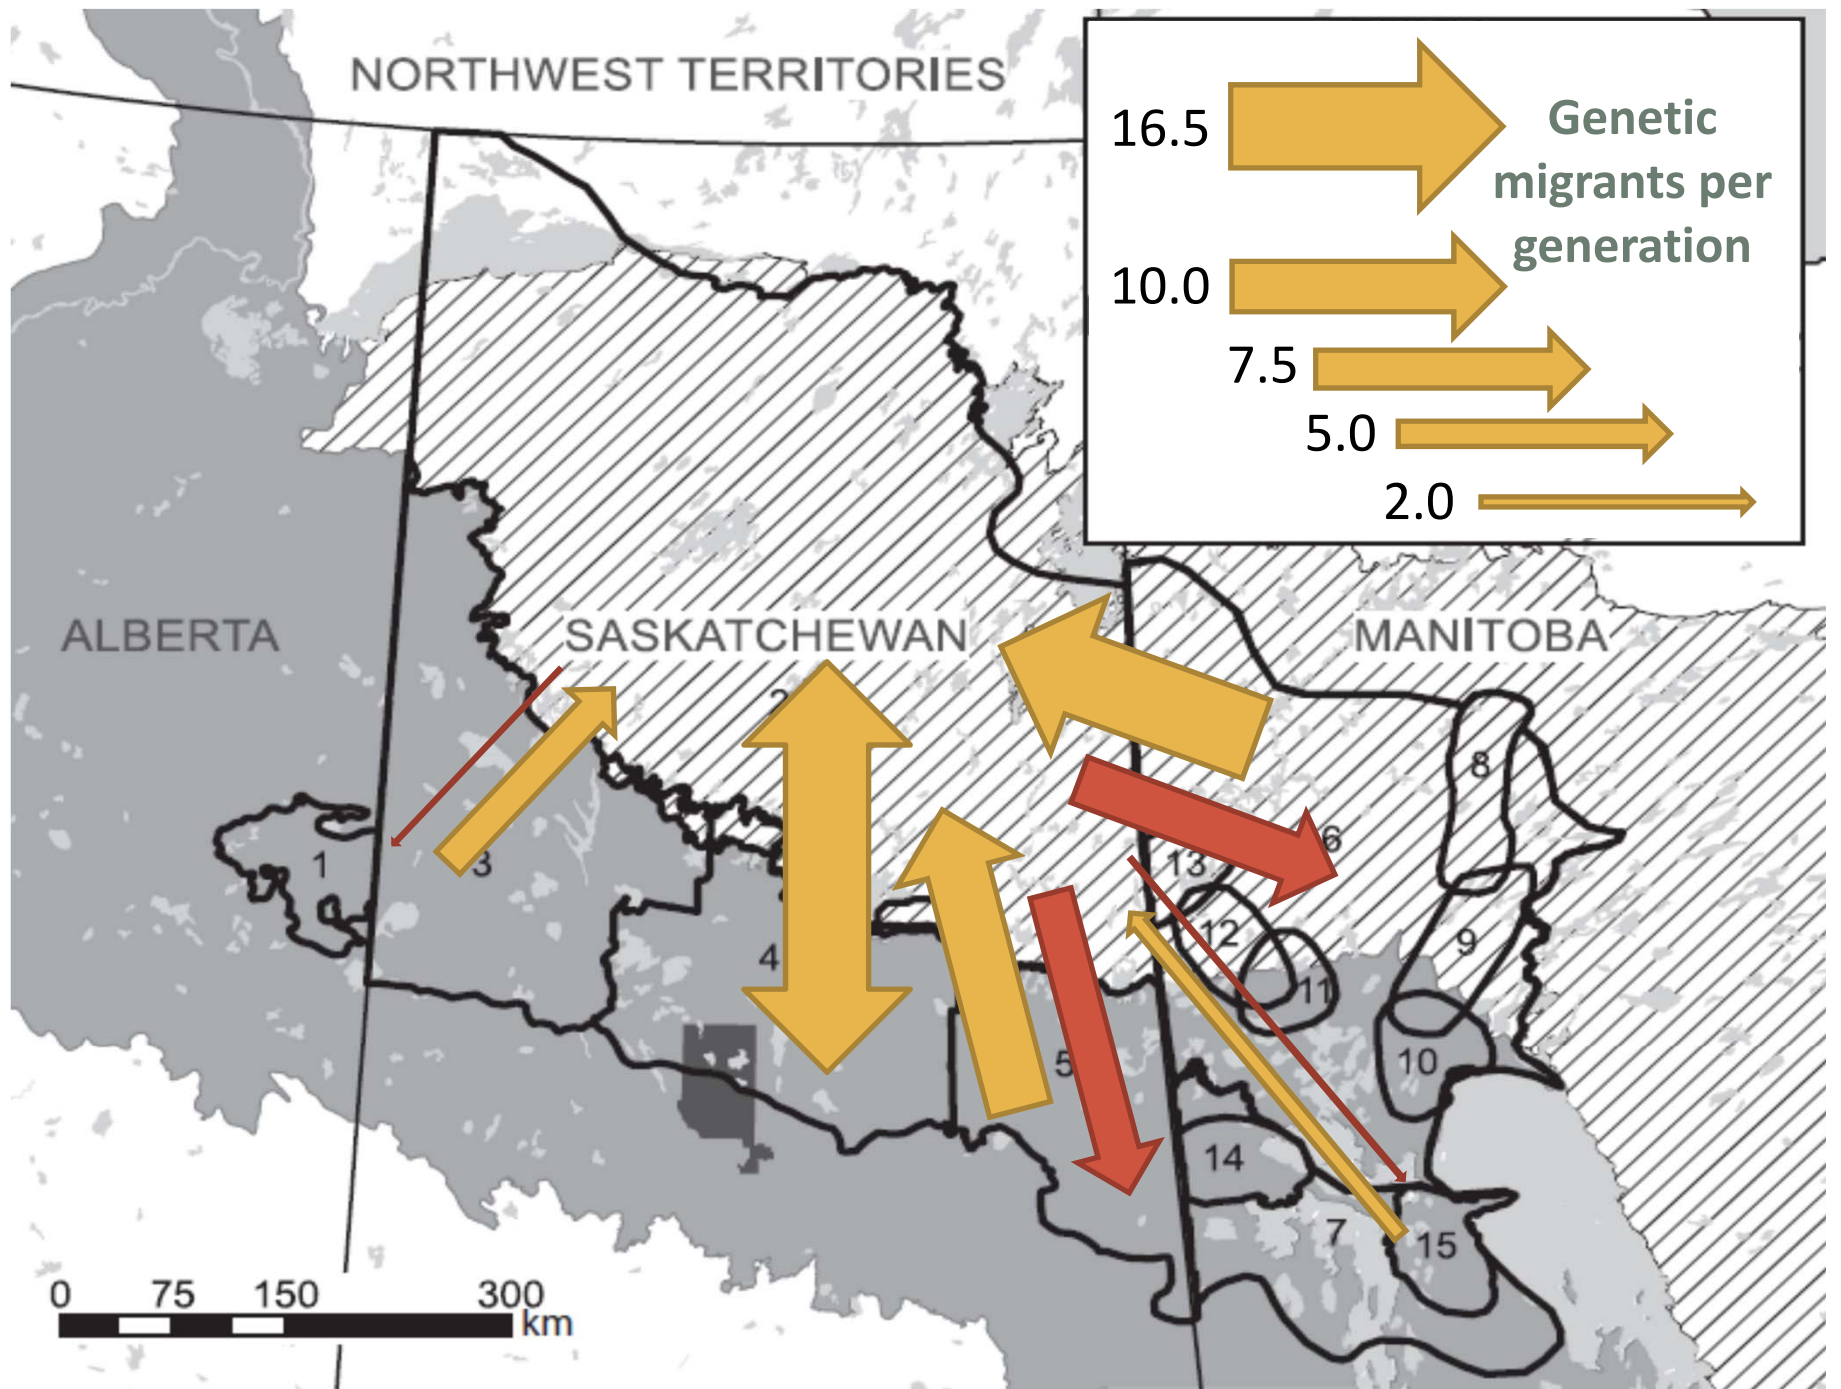

Supplement: MEC-29-3830-s002.pdf [file MEC-29-3830-s002.pdf]
